# Supplementary material for: Early Changes in Near-Infrared Spectroscopy Are Associated With Cardiac Arrest in Children With Congenital Heart Disease
Source: PubMed Central journal article supplement (PMC9271890; doi:10.3389/fped.2022.894125), 2022-06-27
Supplement: Table_1.pdf [file Table_1.pdf]

| <b>Variable</b>       | <b>Percentage of missing data points</b> |
|-----------------------|------------------------------------------|
| SpO2-rSO2c difference | 67.2%                                    |
| SpO2-rSO2s difference | 69.8%                                    |
| Anion gap             | 98.5%                                    |
| Base excess           | 92.4%                                    |
| DBP                   | 46.0%                                    |
| HR                    | 36.2%                                    |
| Fio2                  | 94.0%                                    |
| rSO2c                 | 52.9%                                    |
| rSO2s                 | 56.3%                                    |
| SpO2                  | 44.4%                                    |
| ETCO2                 | 81.6%                                    |
| Urine output          | 36.0%                                    |
| VIS                   | 0.0%                                     |

**Supplemental Table 1: Percentage of Missing Data Points by Variable**
