# Supplementary material for: Early Changes in Near-Infrared Spectroscopy Are Associated With Cardiac Arrest in Children With Congenital Heart Disease
Source: PubMed Central journal article supplement (PMC9271890; doi:10.3389/fped.2022.894125), 2022-06-27
Supplement: Table_2.pdf [file Table_2.pdf]

|                       | Hour 1            |         | Hour 2             |         | Hour 3             |         | Hour 4              |         | Hour 5            |         | Hour 6             |         | Hour 7            |         | Hour 8            |         |
|-----------------------|-------------------|---------|--------------------|---------|--------------------|---------|---------------------|---------|-------------------|---------|--------------------|---------|-------------------|---------|-------------------|---------|
| Variable              | OR [CI]           | P value | OR [CI]            | P value | OR [CI]            | P value | OR [CI]             | P value | OR [CI]           | P value | OR [CI]            | P value | OR [CI]           | P value | OR [CI]           | P value |
| SaO2-rSO2s difference | 1.40(1.18,1.67)   | <0.001  | 1.34 (1.13, 1.58)  | <0.001  | 1.42 (1.18, 1.69)  | <0.001  | 1.31 (1.10, 1.55)   | 0.002   | 1.33 (1.12, 1.58) | 0.001   | 1.45 (1.23, 1.72)  | <0.001  | 1.48 (1.25, 1.75) | <0.001  | 1.50 (1.27, 1.78) | <0.001  |
| SaO2-rSO2c difference | 1.12(0.90,1.38)   | 0.30    | 1.12 (0.91, 1.37)  | 0.25    | 1.09 (0.89, 1.35)  | 0.40    | 1.29 (1.04, 1.59)   | 0.029   | 1.22 (0.98, 1.52) | 0.063   | 1.08 (0.88, 1.33)  | 0.46    | 1.11 (0.9, 1.36)  | 0.33    | 1.09 (0.89, 1.33) | 0.421   |
| HR                    | 1.17(1.08,1.27)   | <0.001  | 1.13 (1.07, 1.36)  | <0.001  | 1.12 (1.03, 1.21)  | 0.005   | 1.12 (1.04, 1.21)   | 0.003   | 1.16 (1.02, 1.19) | 0.016   | 1.10 (1.01, 1.19)  | 0.02    | 1.11 (1.02, 1.19) | 0.01    | 1.11 (1.03, 1.20) | 0.008   |
| DBP                   | 10.01(6.12,16.36) | <0.001  | 0.95 (0.90, 0.998) | 0.044   | 0.92 (0.88, 0.97)  | <0.001  | 0.96 (0.91, 1.01)   | 0.13    | 0.97 (0.93, 1.02) | 0.24    | 0.96 (0.91, 1.01)  | 0.09    | 0.95(0.91, 1.01)  | 0.079   | 0.93 (0.88, 0.98) | 0.008   |
| VIS                   | 0.95(0.90,0.997)  | 0.037   | 9.29 (5.76, 14.97) | <0.001  | 8.56 (5.29, 13.85) | <0.001  | 8.25 (5.010, 13.33) | <0.001  | 7.39(4.61, 11.85) | <0.001  | 7.00 (4.38, 11.16) | <0.001  | 5.66 (3.58, 8.97) | <0.001  | 5.58 (3.52, 8.84) | <0.001  |

|                       | Hour 9            |         | Hour 10           |         | Hour 11           |         | Hour 12           |         | Hour 13         |         | Hour 14          |         | Hour 15          |         |
|-----------------------|-------------------|---------|-------------------|---------|-------------------|---------|-------------------|---------|-----------------|---------|------------------|---------|------------------|---------|
| Variable              | OR [CI]           | P value | OR [CI]           | P value | OR [CI]           | P value | OR [CI]           | P value | OR [CI]         | P value | OR (CI)          | P value | OR (CI)          | P value |
| SaO2-rSO2s difference | 1.48 (1.25, 1.75) | <0.001  | 1.28 (1.09, 1.5)  | 0.002   | 1.35 (1.15, 1.59) | <0.001  | 1.47 (1.24, 1.73) | <0.001  | 1.37(1.16,1.61) | <0.001  | 1.35(1.15,1.58)  | <0.001  | 1.39(1.18,1.64)  | <0.001  |
| SaO2-rSO2c difference | 1.03 (0.84, 1.26) | 0.79    | 1.13 (0.93, 1.38) | 0.190   | 1.14 (0.94, 1.38) | 0.178   | 1.08 (0.89, 1.32) | 0.43    | 1.16(0.96,1.42) | 0.122   | 1.14(0.94,1.39)  | 0.181   | 1.25(1.02,1.53)  | 0.03    |
| HR                    | 1.13 (1.05, 1.22) | <0.001  | 1.10 (1.02, 1.19) | 0.013   | 1.10 (1.02, 1.18) | 0.018   | 1.11(1.04, 1.20)  | 0.002   | 1.13(1.05,1.22) | 0.001   | 1.16(1.07,1.25)  | <0.001  | 1.13(1.04,1.22)  | <0.001  |
| DBP                   | 0.93 (0.88, 0.98) | 0.008   | 0.98 (0.93, 1.03) | 0.215   | 0.99 (0.94, 1.04) | 0.67    | 1.009(0.96,1.05)  | 0.699   | 0.98(0.93,1.02) | 0.367   | 0.970(0.93,1.01) | 0.177   | 0.97(0.926,1.01) | 0.18    |
| VIS                   | 4.16 (2.64, 6.54) | <0.001  | 3.45 (2.22, 5.38) | <0.001  | 3.26 (2.09, 5.08) | <0.001  | 3.09(1.98, 4.84)  | <0.001  | 2.74(1.76,4.29) | <0.001  | 2.87(1.83,4.49)  | <0.001  | 2.78(1.78,4.39)  | <0.001  |

Units of changes for HR are 5 bpm; Units of change for DBP are 5 mm Hg; SaO2-rSO2c difference and SaO2-rSO2s difference are 10% points

**Supplemental Table 2: Odds Ratio of CA for Various Models at Hours 1 through 15 prior to CA**
